# Supplementary material for: The heterocyclic ring of 4-substituted-1,8-naphthalimides is NOT inert to nucleophilic attack, contrary to earlier reports
Source: Royal Society of Chemistry journal article supplement (doi:10.1039/c3ob40639c), 2013-01-01
Supplement: c3ob40639c.pdf [file c3ob40639c.pdf]

## Supplementary Information

### Reaction of 4-substituted-N-aryl-1,8-naphthalimides with primary amines: substitution in the heterocyclic ring.

Ryan K. McKenney, Leah L. Groess, Kyle M. Kopidlansky, Kelsey L. Dunkle, and David E. Lewis\*

#### Contents

|                                                             |      |
|-------------------------------------------------------------|------|
| <sup>1</sup> H NMR spectrum of imide <b>7d</b>              | S-2  |
| <sup>13</sup> C NMR spectrum of imide <b>7d</b>             | S-3  |
| <sup>1</sup> H NMR spectrum of imide <b>7c</b>              | S-4  |
| <sup>13</sup> C NMR spectrum of imide <b>7c</b>             | S-5  |
| <sup>1</sup> H NMR spectrum of imide <b>11</b>              | S-6  |
| <sup>13</sup> C NMR spectrum of imide <b>11</b>             | S-7  |
| <sup>1</sup> H NMR spectrum of imide <b>7a</b>              | S-8  |
| <sup>13</sup> C NMR spectrum of imide <b>7a</b>             | S-9  |
| <sup>1</sup> H NMR spectrum of imide <b>3</b>               | S-10 |
| <sup>13</sup> C NMR spectrum of imide <b>3</b>              | S-11 |
| <sup>1</sup> H NMR spectrum of imide <b>7b</b>              | S-12 |
| <sup>13</sup> C NMR spectrum of imide <b>7b</b>             | S-13 |
| <sup>1</sup> H NMR spectrum of imide <b>12</b>              | S-14 |
| <sup>13</sup> C NMR spectrum of imide <b>12</b>             | S-15 |
| Cartesian coordinates for activated complex model <b>10</b> | S-16 |

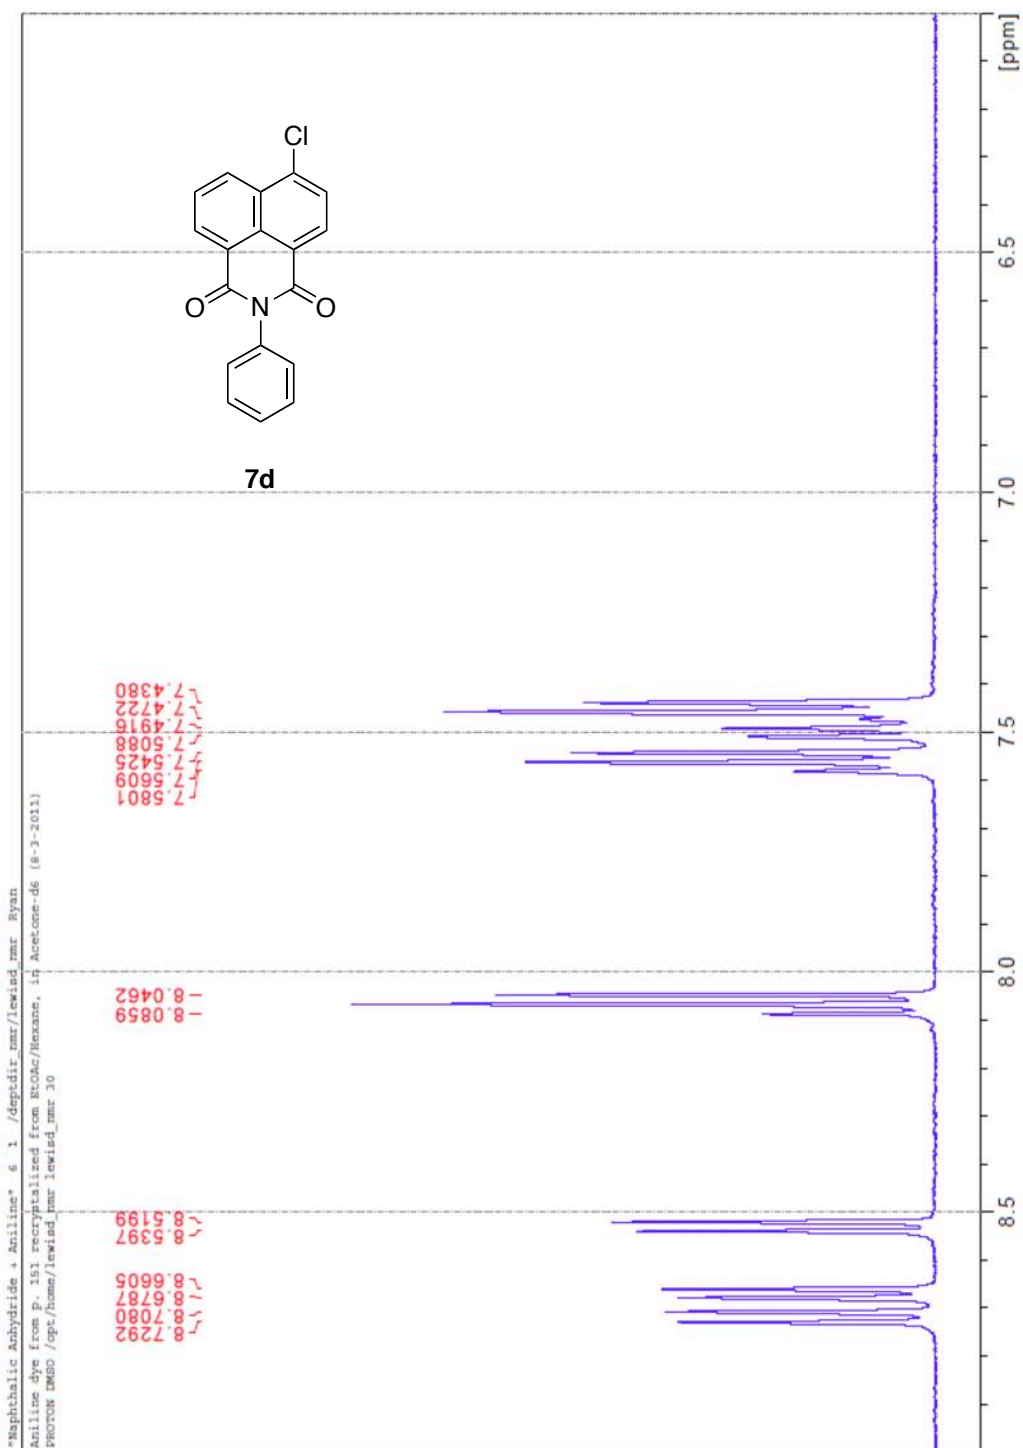

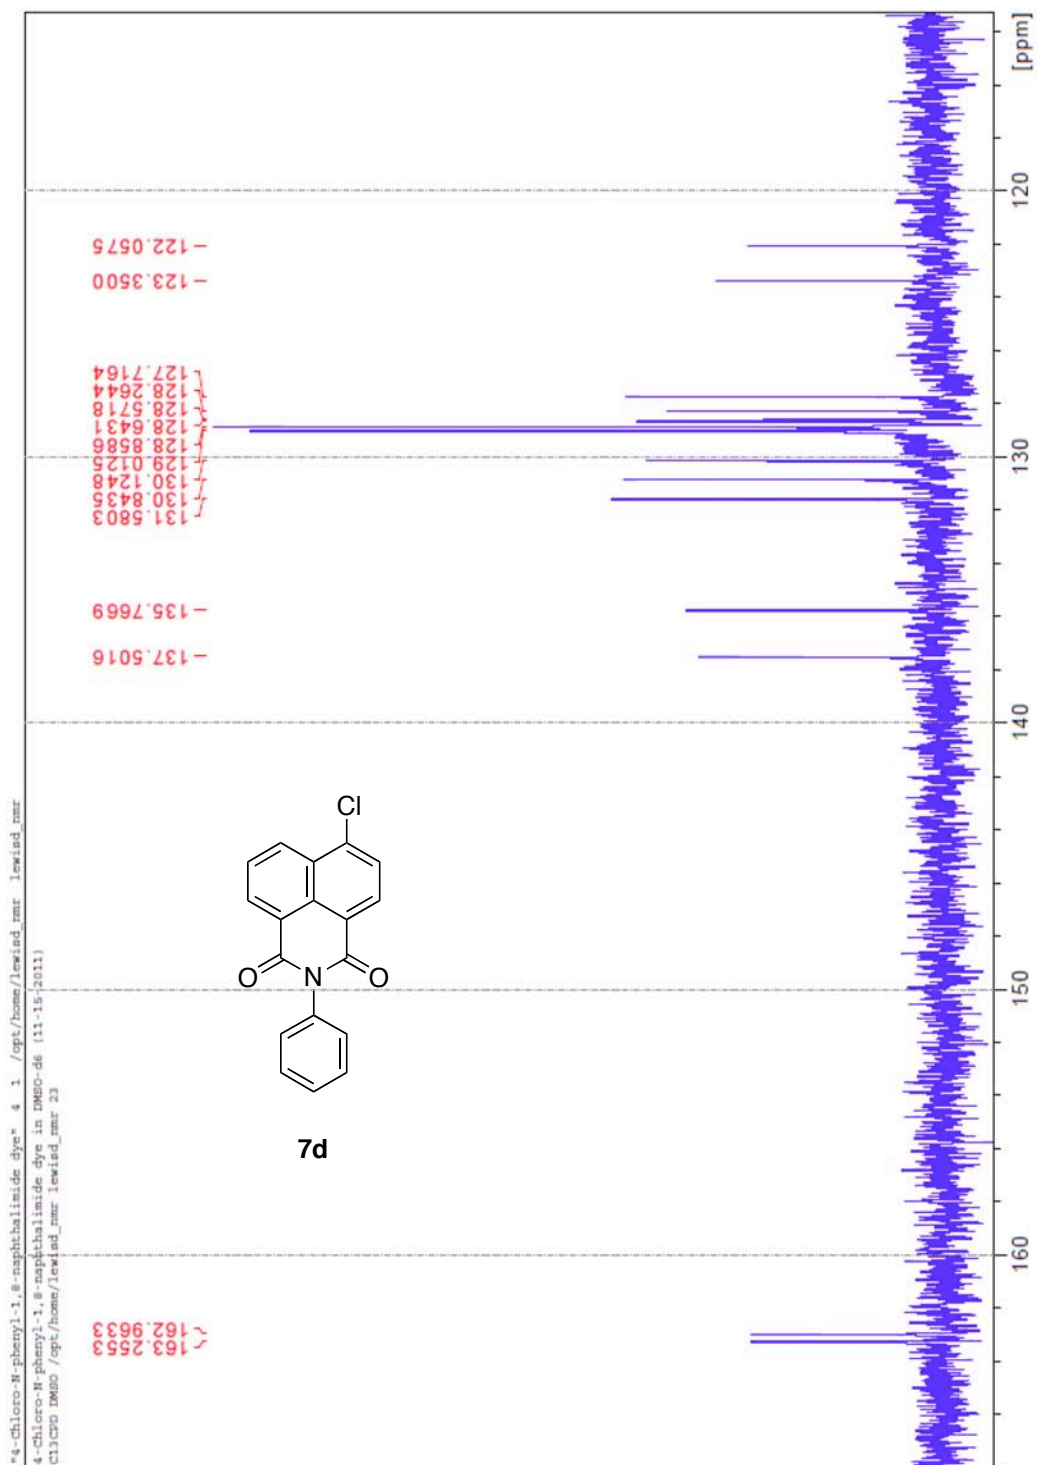

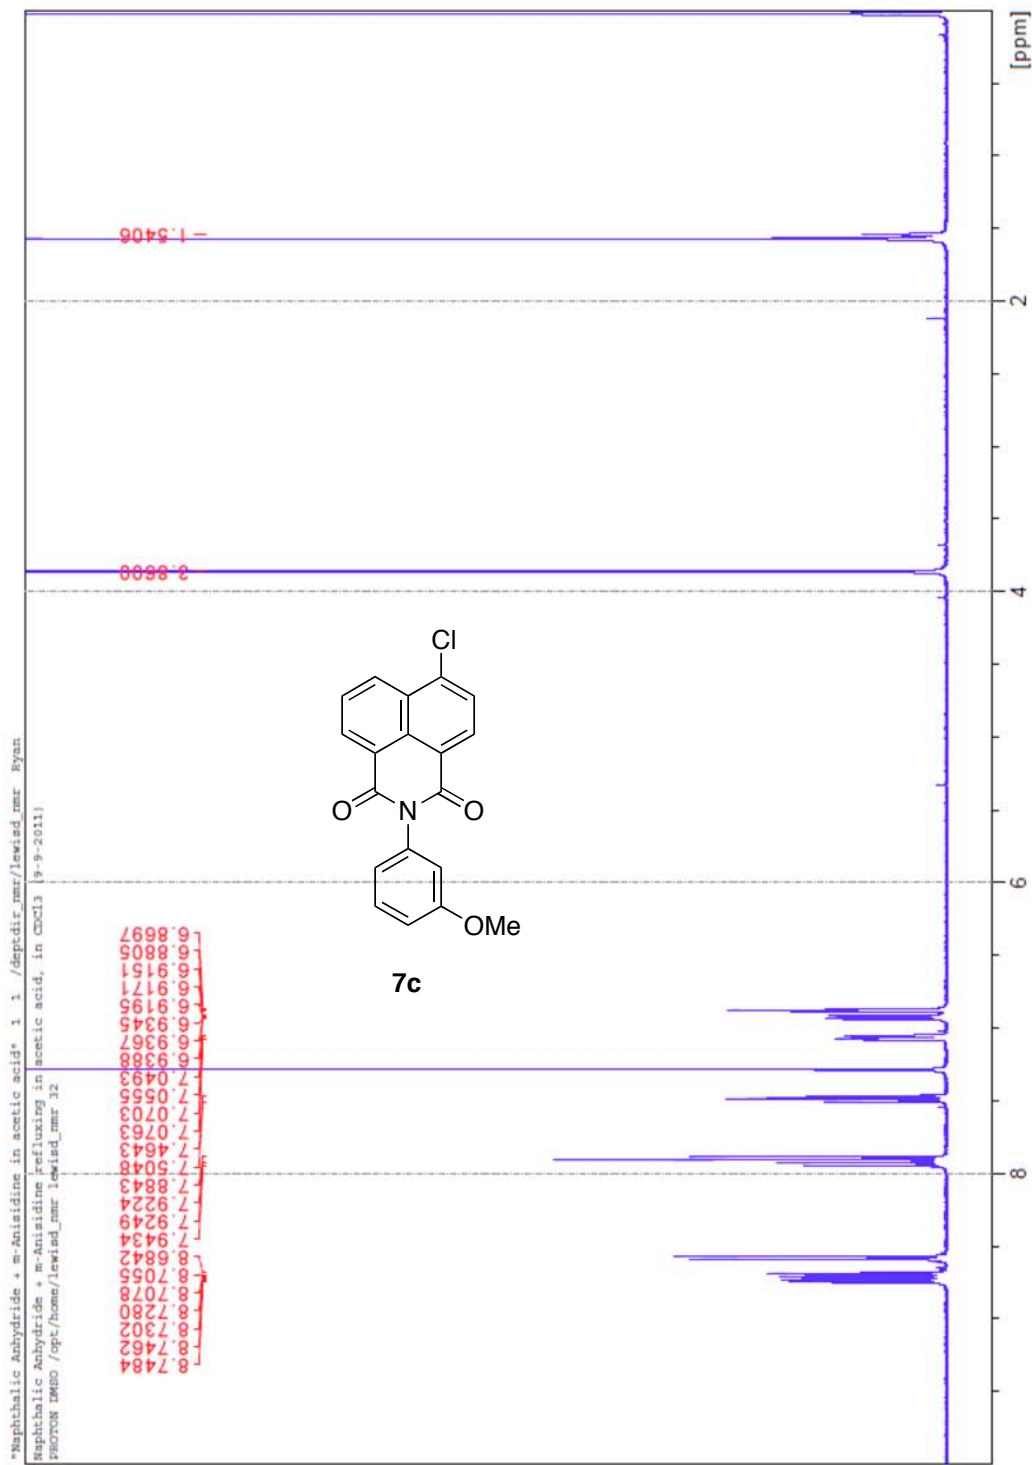

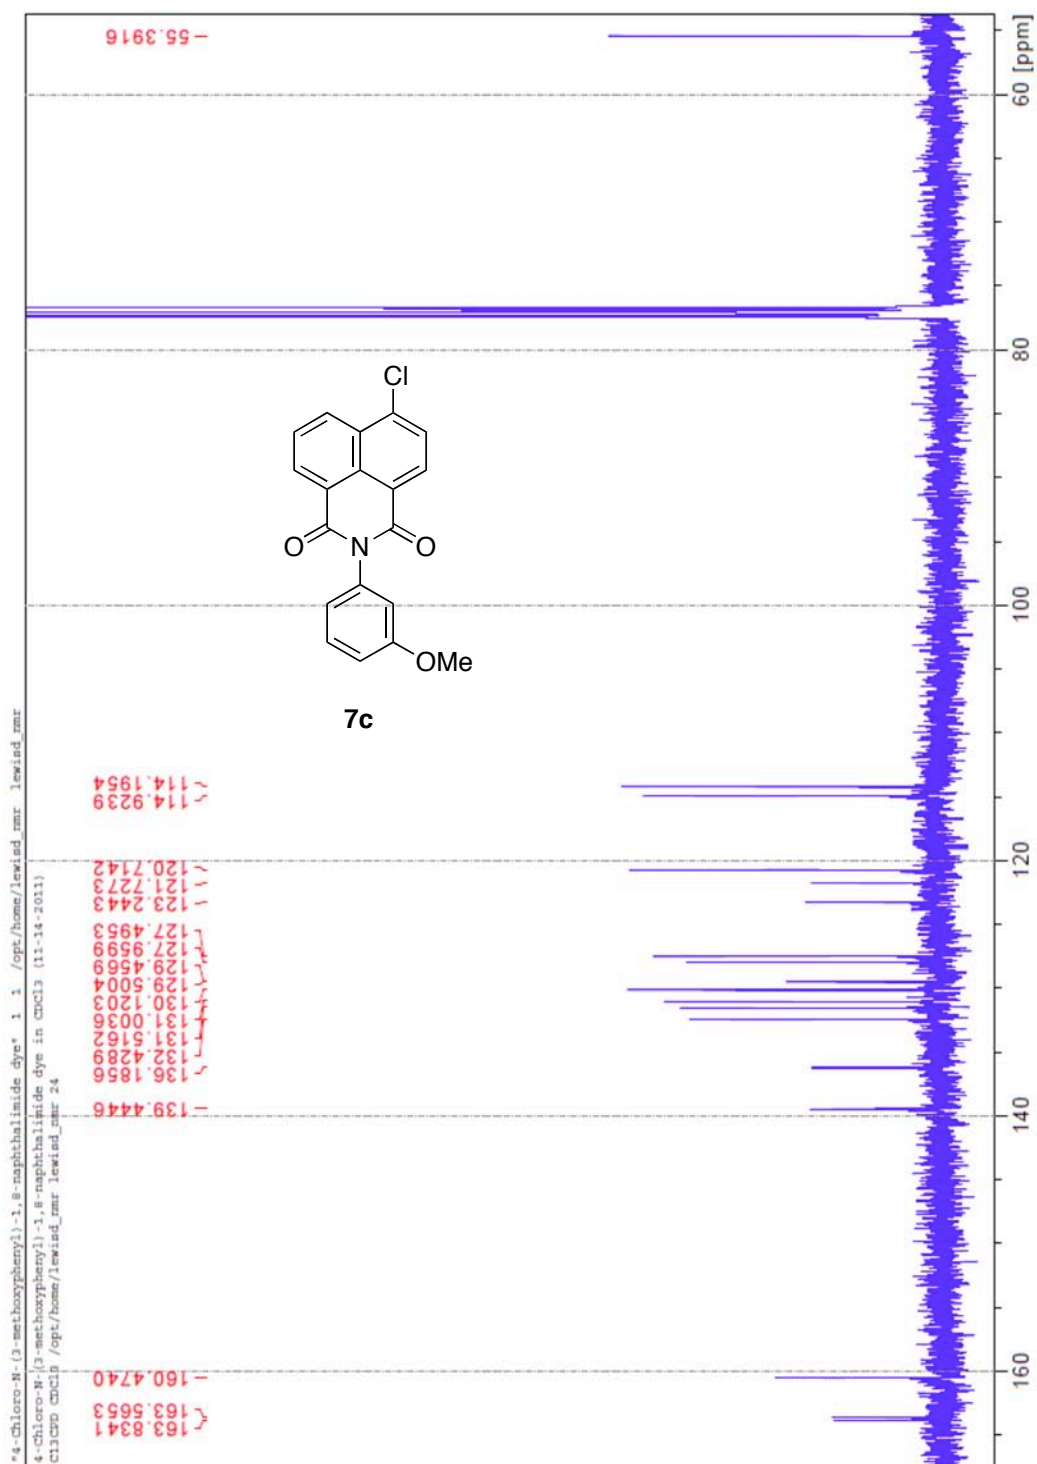



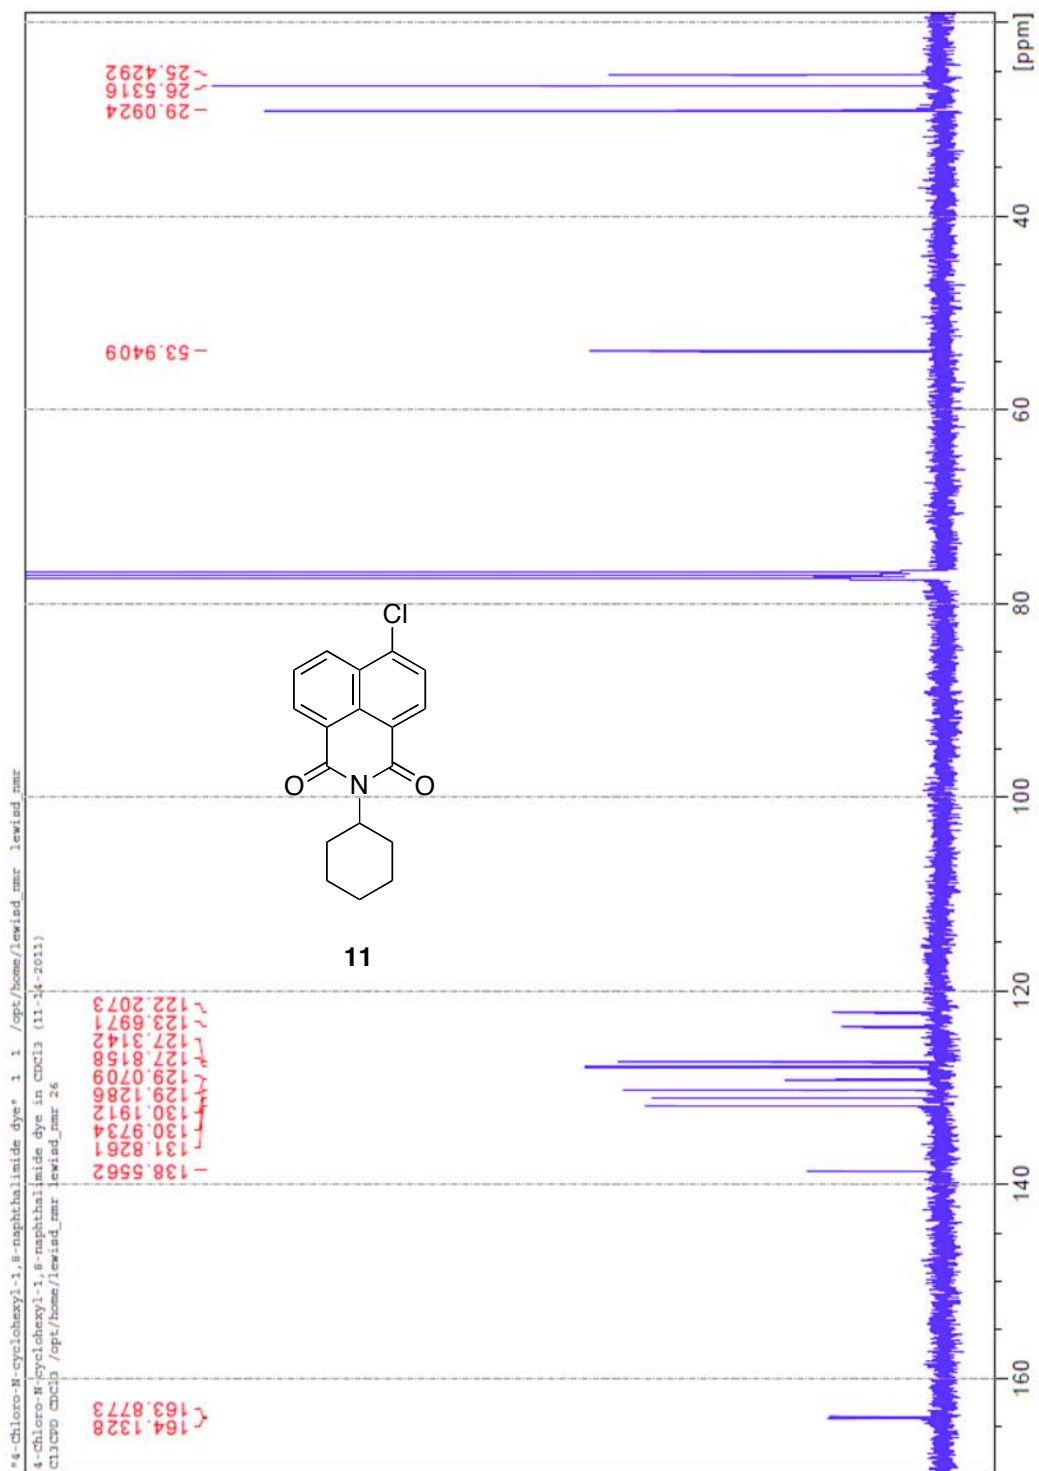

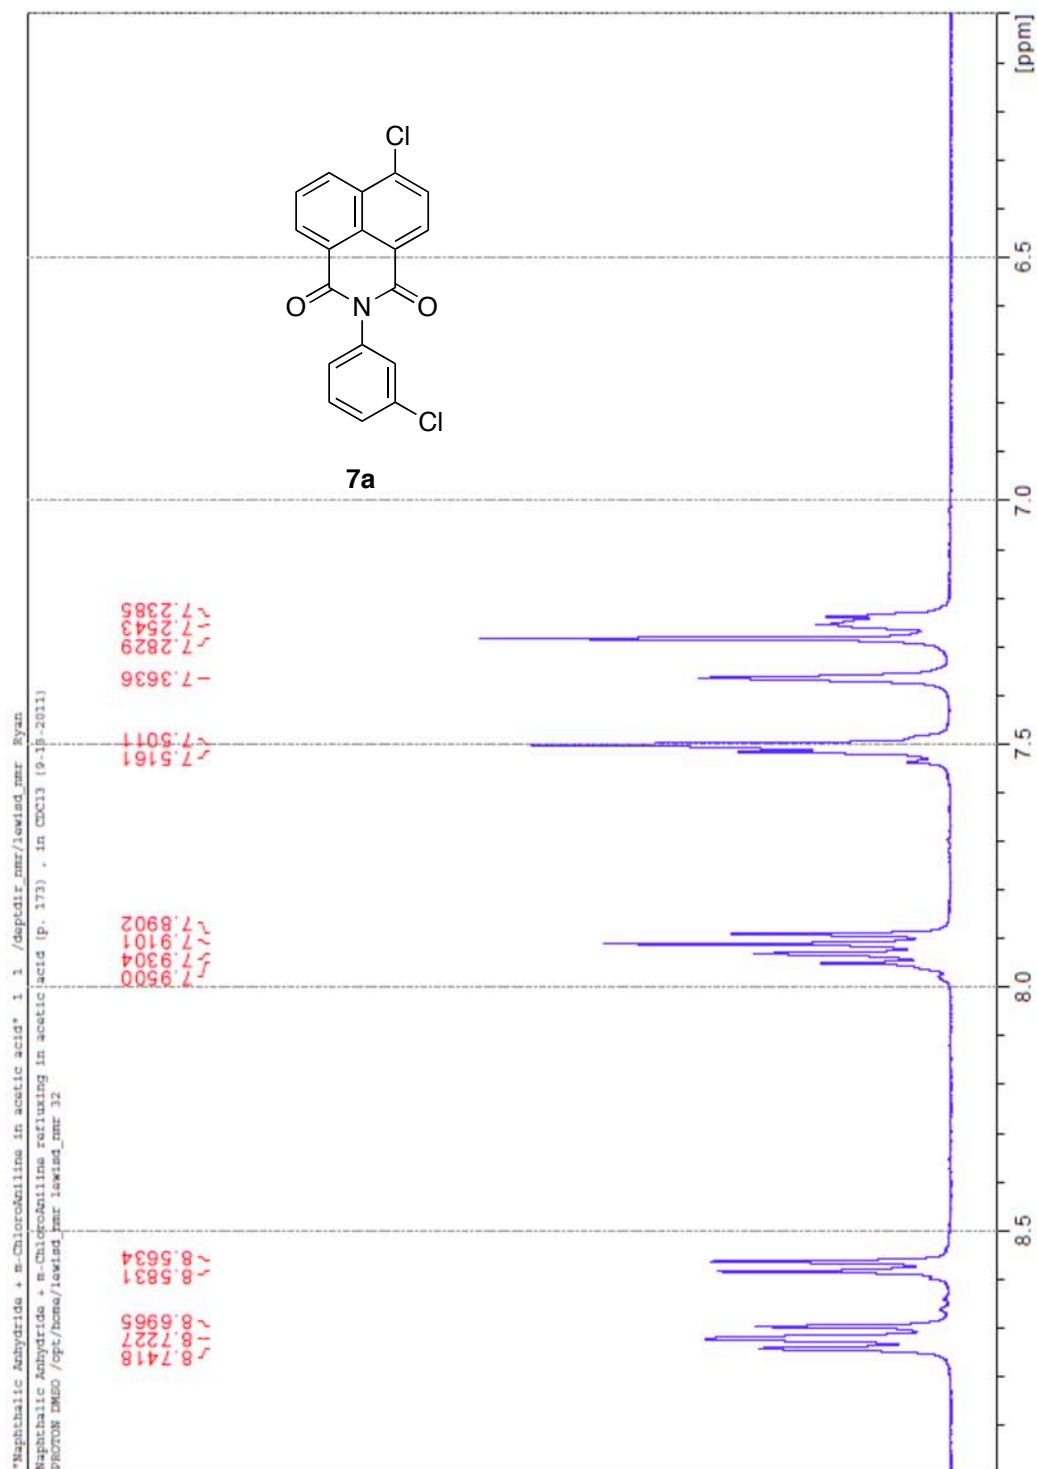



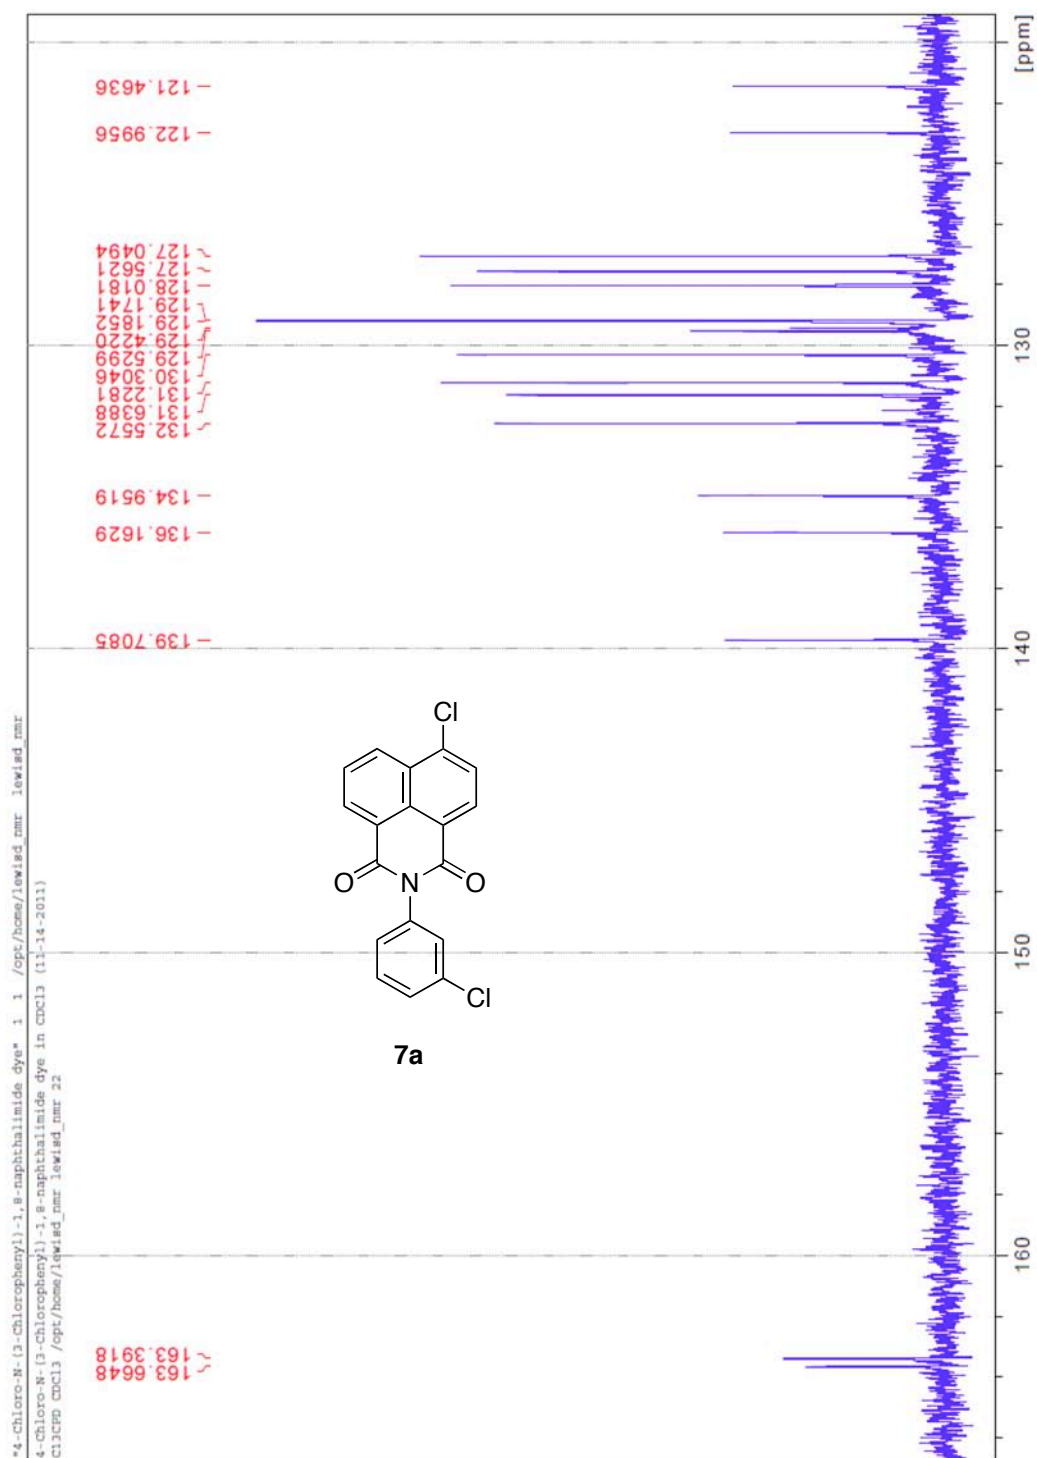

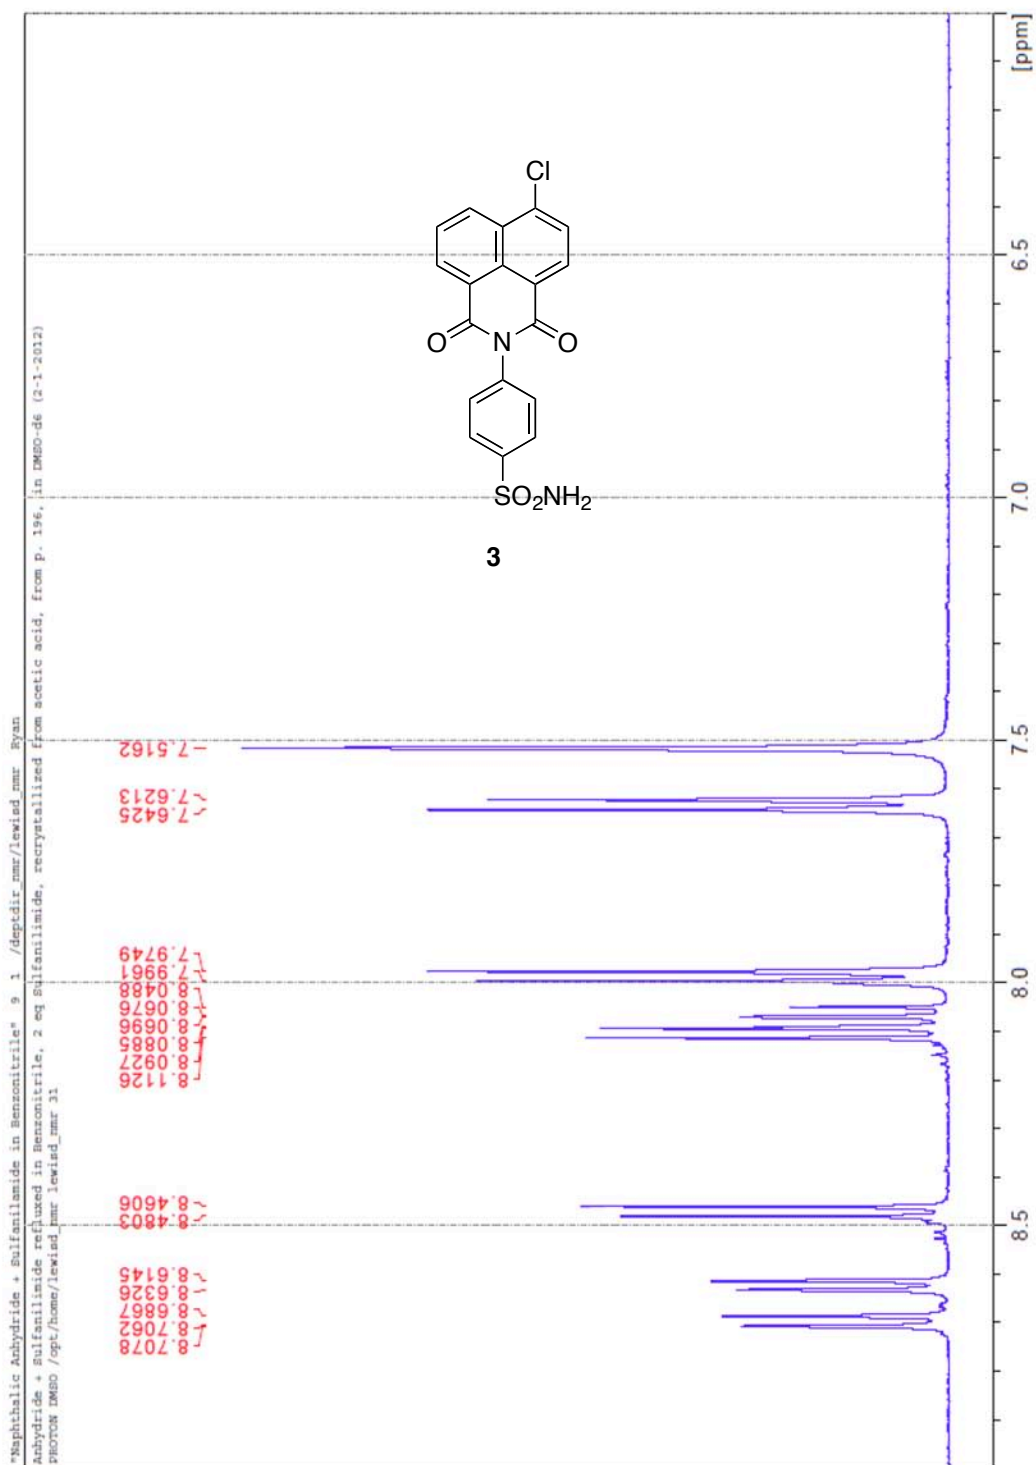

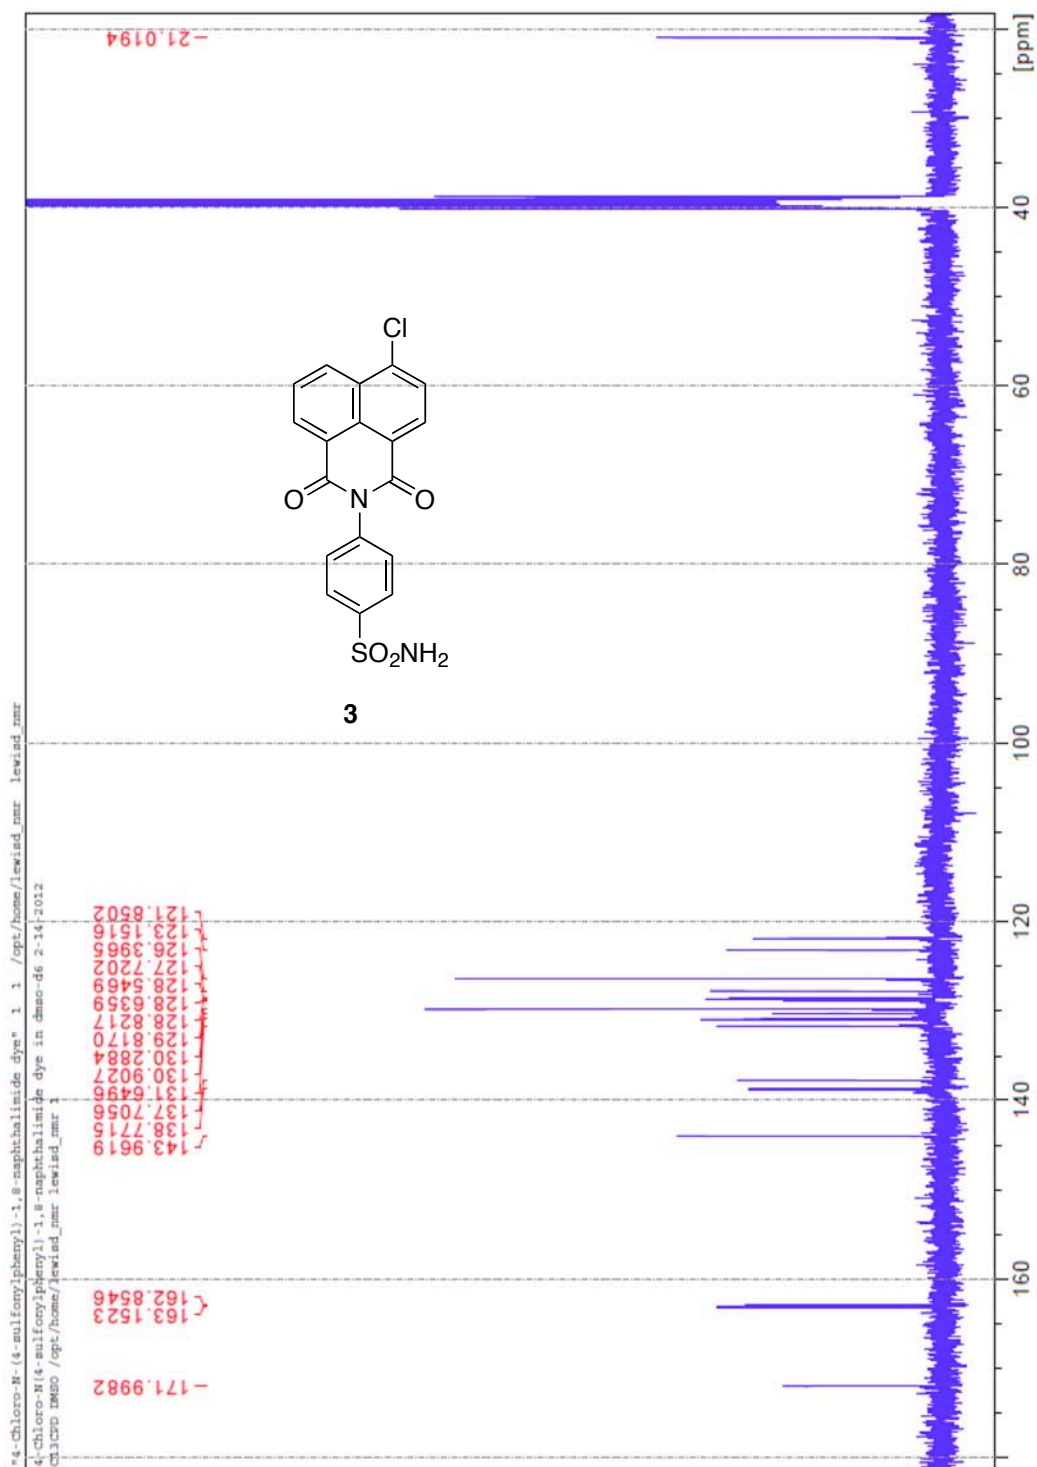

The resonances at 172 and 21 ppm are from residual acetic acid in this sample.

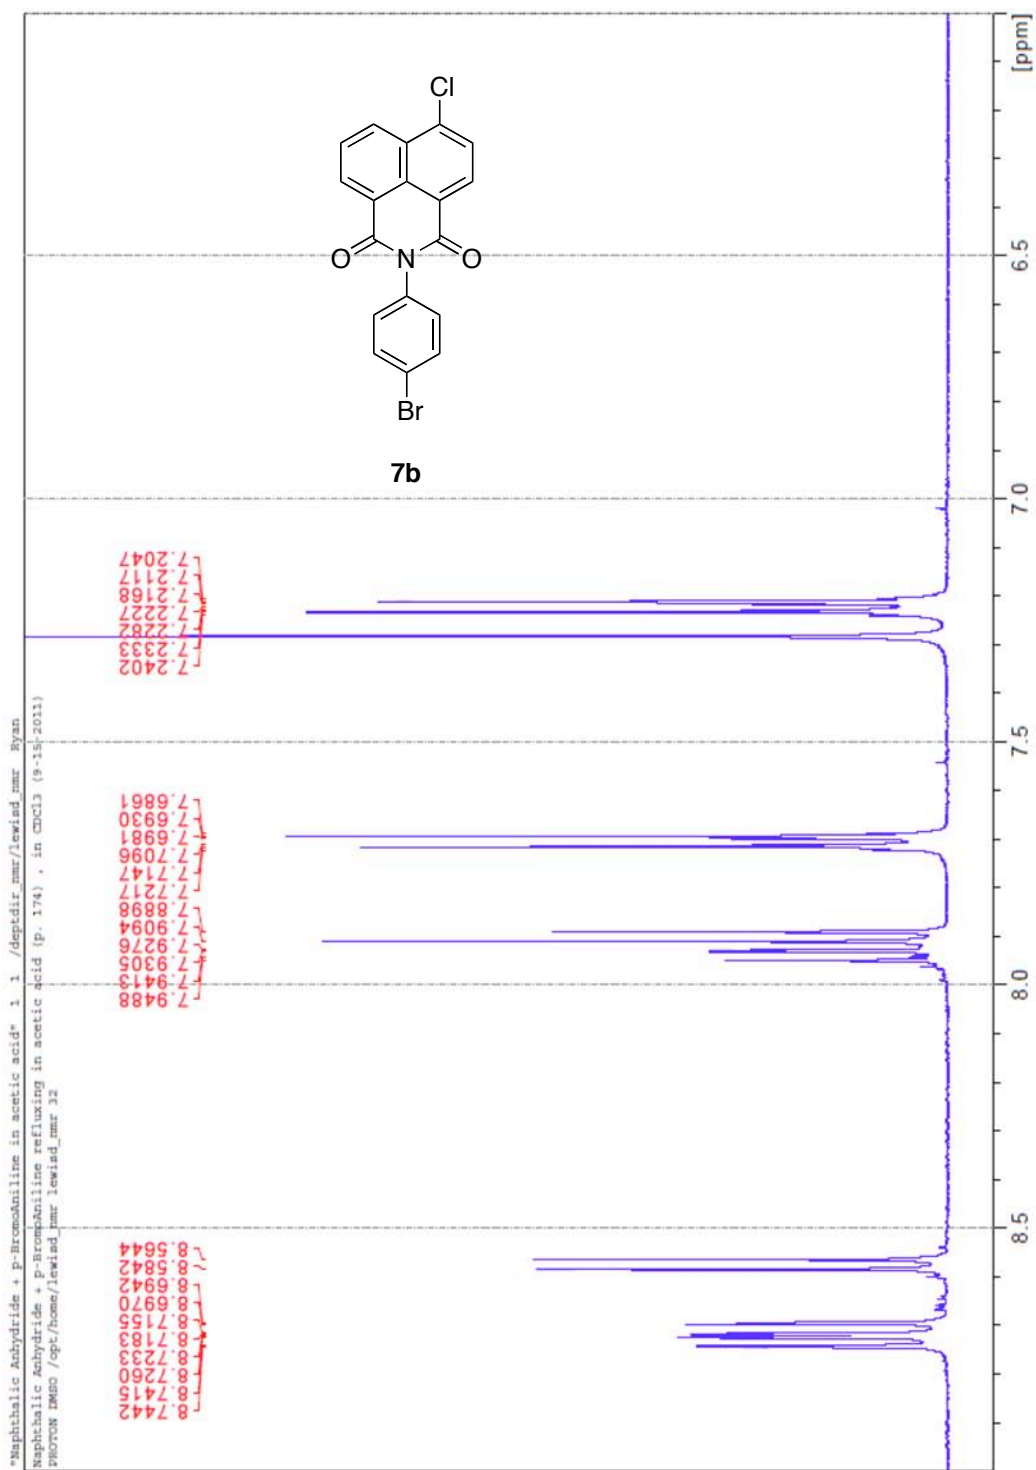

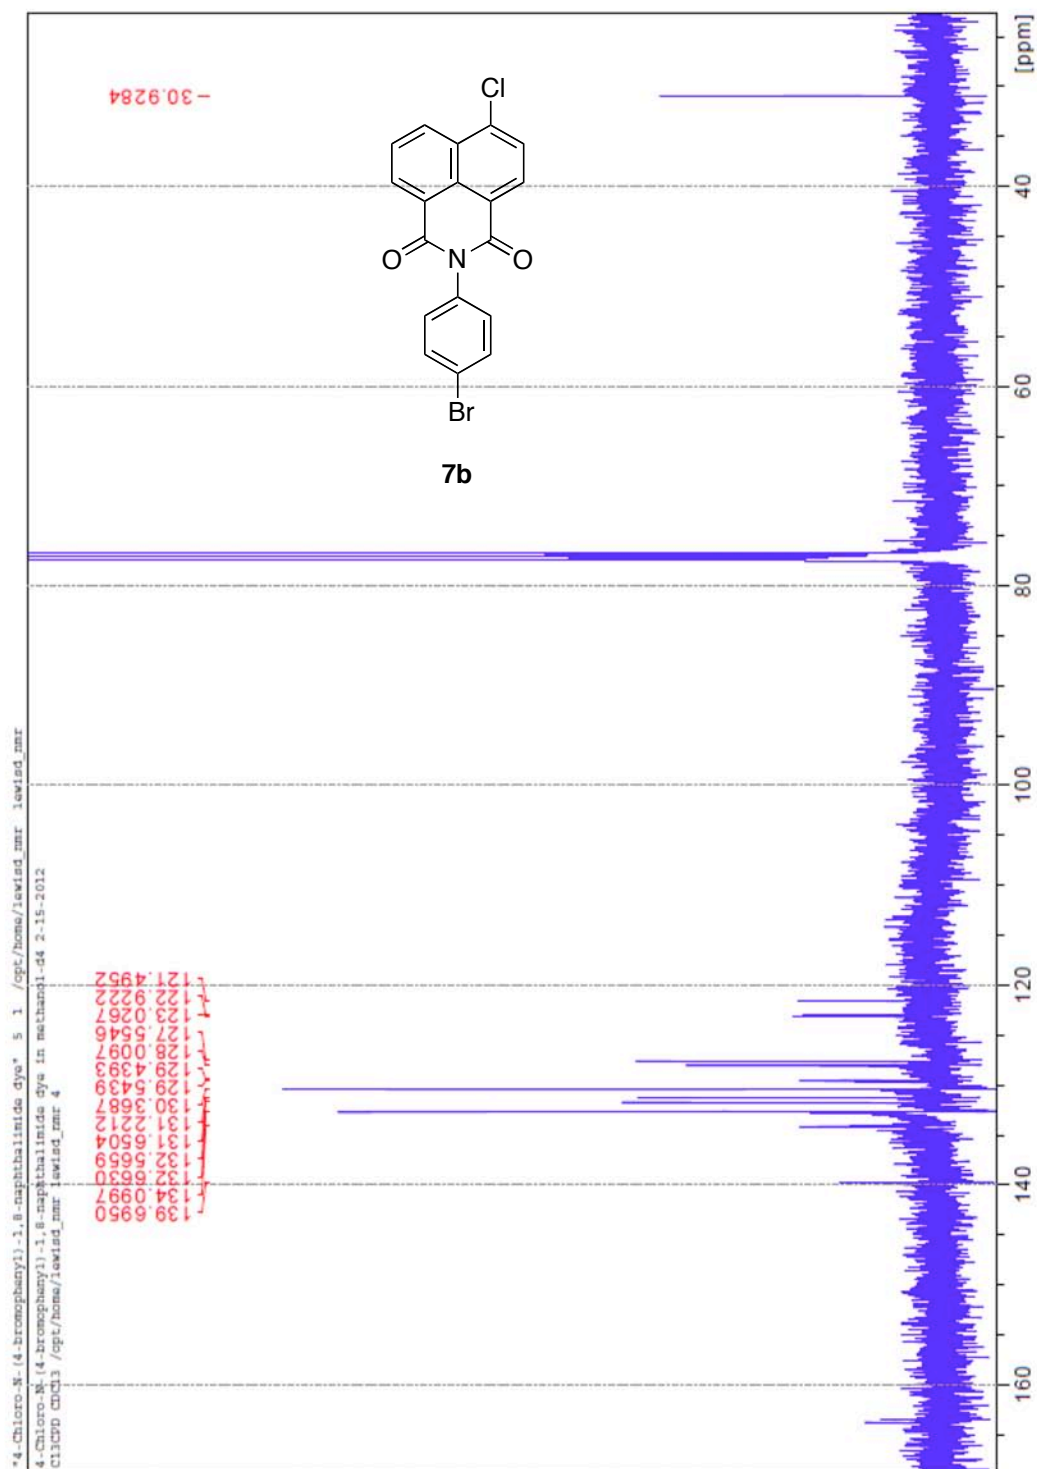

(The peak at 30.9 ppm is due to residual acetone in the NMR tube).

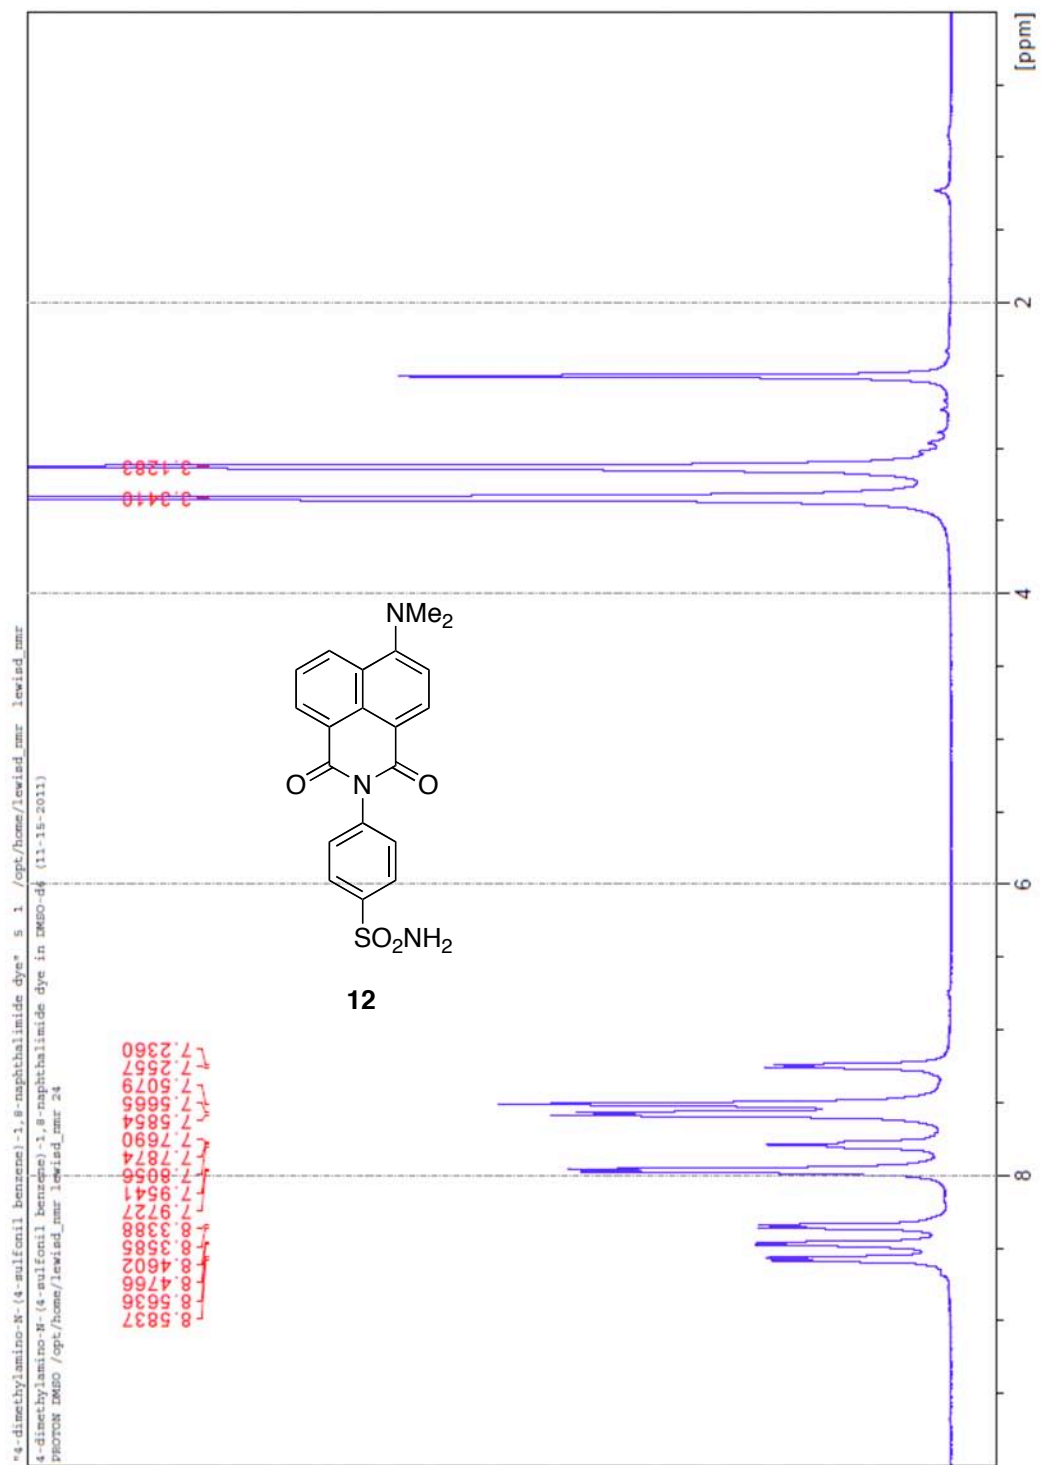

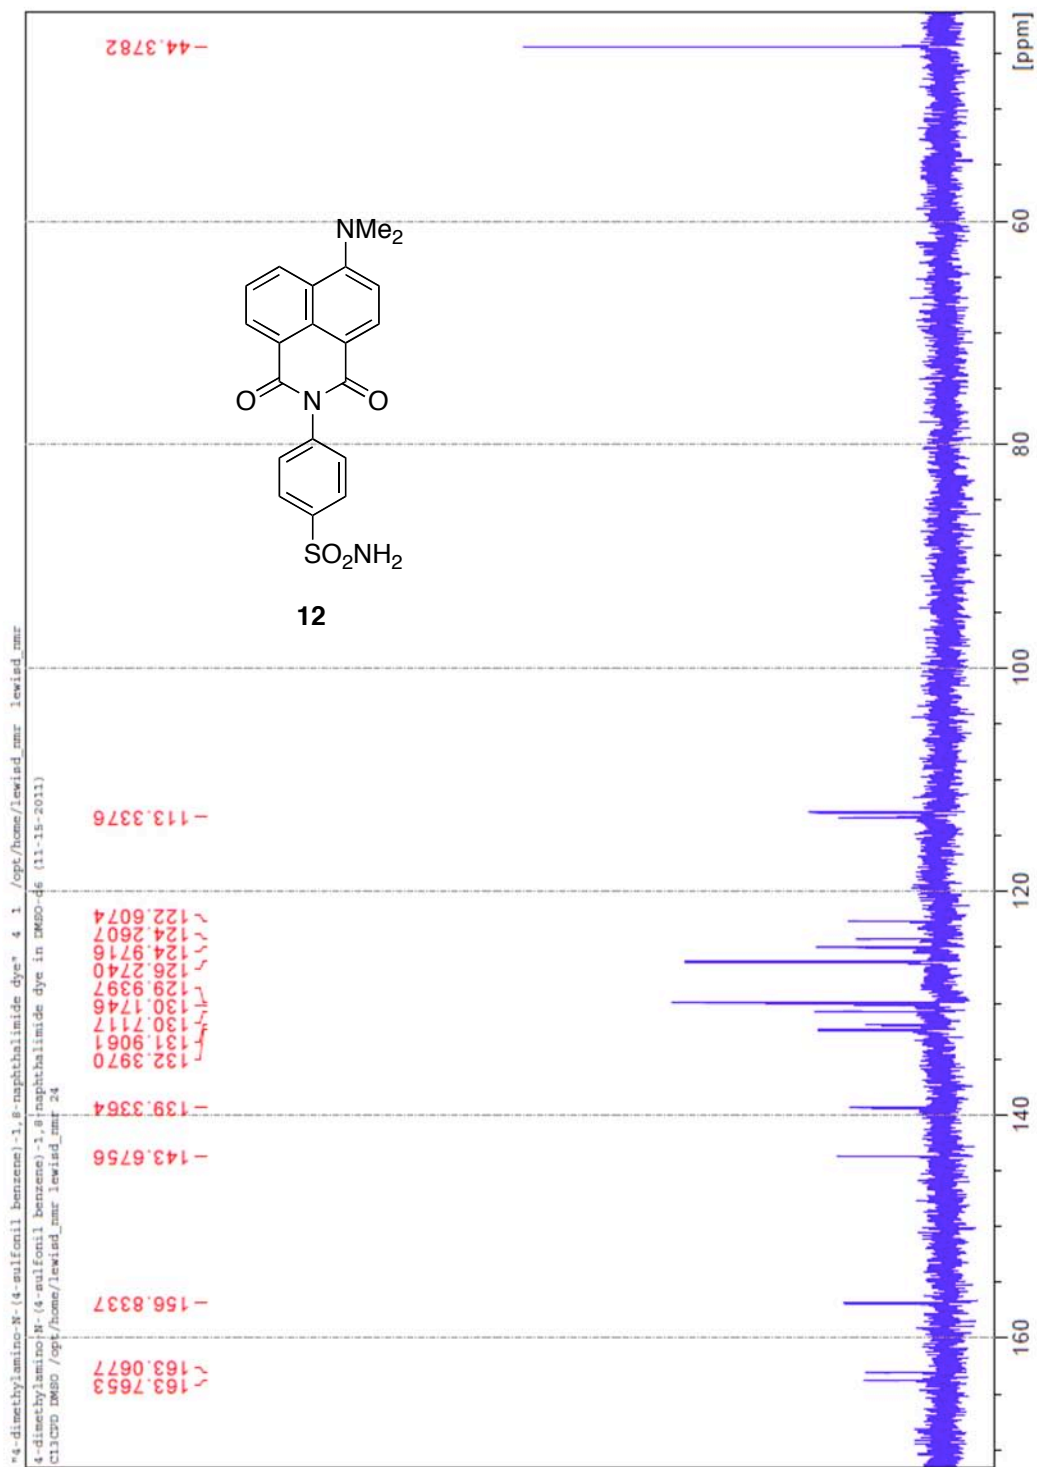

Cartesian coordinates of Activated Complex Model 10

|    |           |           |           |
|----|-----------|-----------|-----------|
| C  | 0.465136  | 3.614016  | -3.197799 |
| C  | 0.463747  | 3.374732  | -0.386013 |
| C  | 1.352533  | 2.691277  | -2.586478 |
| C  | -0.403844 | 4.360147  | -2.436033 |
| C  | -0.389141 | 4.250434  | -1.033247 |
| C  | 1.326249  | 2.527020  | -1.155251 |
| C  | 2.285069  | 1.914290  | -3.336233 |
| C  | 2.170320  | 1.534645  | -0.567665 |
| C  | 3.142839  | 1.025383  | -2.736282 |
| C  | 3.069659  | 0.828039  | -1.343324 |
| C  | 0.470045  | 3.469274  | 1.127055  |
| N  | 1.533785  | 2.876295  | 1.737931  |
| C  | 2.001084  | 1.124879  | 0.854632  |
| Cl | 2.366082  | 2.084926  | -5.087698 |
| C  | 1.632759  | 2.725319  | 3.130148  |
| C  | 2.020821  | 2.264410  | 5.881618  |
| C  | 0.529159  | 2.538868  | 3.986022  |
| C  | 2.929395  | 2.678679  | 3.678886  |
| C  | 3.120124  | 2.443732  | 5.041997  |
| C  | 0.729943  | 2.321378  | 5.346193  |
| O  | 3.144989  | 0.715486  | 1.430477  |
| N  | 0.877535  | 0.363131  | 1.246795  |
| C  | 0.929750  | -1.092791 | 0.993794  |
| C  | -0.285257 | -1.776380 | 1.620901  |
| C  | -0.276990 | -3.298365 | 1.435703  |
| C  | -1.492450 | -3.981038 | 2.071075  |
| O  | -0.390179 | 4.144296  | 1.698902  |
| H  | 3.859096  | 0.455654  | -3.339276 |
| H  | 3.725338  | 0.086983  | -0.872009 |
| H  | -1.032939 | 4.880677  | -0.409120 |
| H  | -1.088861 | 5.066185  | -2.919227 |
| H  | 0.484772  | 3.726286  | -4.287857 |
| H  | 2.958503  | 0.552348  | 2.355881  |
| H  | 1.850158  | -1.480967 | 1.444775  |
| H  | -0.314002 | -1.524111 | 2.687086  |
| H  | 0.980276  | -1.314493 | -0.078358 |
| H  | -0.243668 | -3.537241 | 0.366571  |
| H  | 0.641327  | -3.711260 | 1.868633  |
| H  | -1.460923 | -5.066261 | 1.921029  |
| H  | -1.533579 | -3.793828 | 3.150184  |
| H  | -2.427289 | -3.611189 | 1.634607  |
| H  | -1.200606 | -1.363875 | 1.181365  |
| H  | 0.026763  | 0.762165  | 0.871159  |
| H  | -0.484531 | 2.596086  | 3.573259  |
| H  | 3.782878  | 2.859273  | 3.015435  |
| H  | 4.136989  | 2.417734  | 5.450072  |
| H  | 2.166490  | 2.090033  | 6.953807  |
| H  | -0.138493 | 2.189008  | 6.001566  |
